# Supplementary material for: Phase-Locked Signals Elucidate Circuit Architecture of an Oscillatory Pathway
Source: PLOS journal article supplement (doi:10.1371/journal.pcbi.1001040), 2010-12-23
Supplement: S1 (10.1371/journal.pcbi.1001040.s001) [file journal.pcbi.1001040.s001]

301 Moved Permanently

# Moved Permanently

The document has moved here.

---

Apache Server at www.ploscompbiol.org Port 80
